# Supplementary material for: Home Health Care Availability and Discharge Delays in Children With Medical Complexity
Source: Oxford University Press journal article supplement (doi:10.1542/peds.2018-1951), 2018-12-03
Supplement: peds_20181951supplementarydata1.doc [file peds_20181951supplementarydata1.doc]

| **Supplement 1. Inclusion criteria** |
| --- |
| 1. Less than 21 years of age at time of discharge 2. Medically complex (all 3)    1. Multiple medications and/or therapies; three or more therapeutic interventions (medications, nutritional support, respiratory therapy, dialysis, airway clearance, oxygen, etc.)    2. ≥2 subspecialists involved    3. ≥2 chronic medical diagnoses expected to last at least 12 months or more 3. Technology dependent (one or more of the following)    1. IV meds (TPN, milrinone drips, etc., thru central or PICC line)    2. Tracheostomy    3. Mechanical ventilation ≥8 hours per day includes CPAP, BiPAP (invasive or noninvasive)    4. Oxygen therapy    5. Gastrostomy/jejunostomy    6. Airway clearance (includes vest, IPV, cough assist) 4. Extended hours of home care nursing care ≥8 hours per week at discharge |
| IV, intravenous therapy; TPN, total parenteral nutrition; PICC, peripherally inserted central catheter; CPAP, continuous positive airway pressure; BiPAP, bi-level positive airway pressure; IPV, intrapulmonary percussive ventilator. |
